# Supplementary material
Source: publisher figshare collection journal article supplement (https://karger.figshare.com/ndownloader/files/31559138)
Supplement: Supplementary file 1 [file 31559138]

**Table S1. Baseline characteristics of participants according to the quartiles of serum adipsin levels***

| Quartiles of adipsin levels (ng/mL) | | | | | *P* value for difference |
| --- | --- | --- | --- | --- | --- |
| Variables | Quartile 1 | Quartile 2 | Quartile 3 | Quartile 4 |
| n = 227 | n = 227 | n = 227 | n = 227 |
| Remitted NAFLD * | 102 (41.3%) | 73(29.6%) a | 43(17.4%) ab | 29(11.7%) ab | <0.001 |
| Age (year) ‡ | 58.75 (55.83-62.92) | 59.42 (56.25-63.17) | 60.46 (56.90-64.69) a | 61.08 (57.50-64.42) ab | <0.001 |
| Gender (males%) * | 60 (21.0%) | 70 (24.5%) | 70 (24.5%) | 86 (30.1%) | 0.069 |
| Adipsin (ng/mL) ‡ | 2894.48 (2699.06-3015.01) | 3290.92 (3214.34 -3381.80) a | 3663.51 (3565.05-3782.58) ab | 4230.72 (4055.54-4570.55) abc | <0.001 |
| BMI (kg/m2) † | 23.36±2.40 | 24.41±2.58a | 25.49±2.66ab | 26.35±3.59abc | <0.001 |
| WHR† | 0.91±0.07 | 0.92±0.06 | 0.93±0.06a | 0.95±0.06abc | <0.001 |
| SBP (mm/Hg) † | 124.23±17.40 | 126.62±18.03 | 129.08±18.90a | 131.50±17.36ab | <0.001 |
| DBP (mm/Hg) † | 74.54±9.59 | 76.37±10.57 | 78.22±10.54a | 79.82±10.82ab | <0.001 |
| Alb (g/L) ‡ | 46.10 (43.00-48.30) | 46.00 (43.10-48.10) | 45.50 (42.60-47.90) | 44.50 (39.8-47.20) abc | <0.001 |
| Glucose (mmol/L) ‡ | 4.64 (4.32-5.09) | 4.72 (4.35-5.13) | 4.85 (4.43-5.36) a | 4.84 (4.40-5.60) ab | <0.001 |
| Insulin (μU/mL) ‡ | 7.49 (5.29-10.39) | 9.29 (6.79-12.53) a | 10.59 (7.98-15.05) ab | 11.35 (8.29-15.33) ab | <0.001 |
| HOMA-IR ‡ | 1.58 (1.07-2.31) | 1.97 (1.40-2.76) a | 2.31 (1.70-3.31) ab | 2.51 (1.77-3.48) ab | <0.001 |
| TC (mmol/L) ‡ | 5.57 (4.98-6.14) | 5.56 (4.91-6.31) | 5.35 (4.77-6.08) | 5.47 (4.71-6.02) | 0.113 |
| TG (mmol/L) ‡ | 1.23 (0.92-1.73) | 1.26 (0.87-1.85) | 1.49 (1.09-2.10) ab | 1.64 (1.15-3.42) ab | <0.001 |
| HDL-C (mmol/L) ‡ | 1.40 (1.15-1.69) | 132 (1.11-1.57) | 1.21 (1.01-1.45) ab | 1.16 (1.00-1.40) ab | <0.001 |
| LDL-C (mmol/L) † | 3.65±0.89 | 3.77±0.87 | 3.56±0.96 | 3.59±0.91 | 0.071 |
| UA (μmol/L) ‡ | 323.30 (275.40-380.60) | 334.87 (293.76-386.57) | 348.93 (302.61-402.00) ab | 367.46 (318.67-439.19) abc | <0.001 |
| ALT (U/L) ‡ | 14.00 (12.00-19.00) | 16.00 (13.00-23.00) | 17.00 (12.00-22.00) | 18.00 (13.00-24.00) a | 0.001 |
| AST (U/L) ‡ | 18.00 (16.00-21.00) | 18.00 (16.00-21.00) | 19.00 (15.00-22.00) | 19.00 (15.00-23.00) | 0.676 |
| Trunk fat percentage (%) ‡ | 34.76 (30.30-38.64) | 35.99 (31.15-38.86) | 37.35 (32.14-41.03) ab | 36.51 (31.91-40.97) a | <0.001 |
| Physical activities, MET/d ‡ | 23.80 (20.35-27.88) | 23.21 (20.46-27.80) | 22.83 (19.35-27.18) | 23.01 (19.32-27.63) | 0.220 |
| Current smoking * | 16 (21.3%) | 14 (18.7%) | 20 (26.7%) | 25 (33.3%) | 0.250 |
| Current drinking * | 17 (23.3%) | 20 (27.4%) | 22 (30.1%) | 14 (19.2%) | 0.534 |
| Hypertension * | 41 (13.7%) | 69 (23.1%) a | 95 (31.8%) ab | 94 (31.4%) ab | <0.001 |
| Diabetes * | 9 (12.9%) | 11 (15.7%) | 22 (31.4%) | 28 (40.0%) ab | 0.017 |

* Categorical variables are shown as numbers and percentages and compared using Chi-square test or fisher’s exact test.

† Normally distributed data were expressed as means and standard deviations and compared using one-way ANOVA test.

‡ Non-normally distributed data were expressed as median and 25th–75th interquartile range and compared using Kruskal-Wallis test.

a: *P* < 0.05 compared to Quartile 1; b: *P* < 0.05 compared to Quartile 2; c: *P* < 0.05 compared to Quartile 3.
